# Supplementary material for: Human basonuclin 2 up-regulates a cascade set of interferon-stimulated genes with anti-cancerous properties in a lung cancer model
Source: Springer Nature journal article supplement (doi:10.1186/s12935-017-0394-x), 2017-02-06

Supplementary Figure 1

A

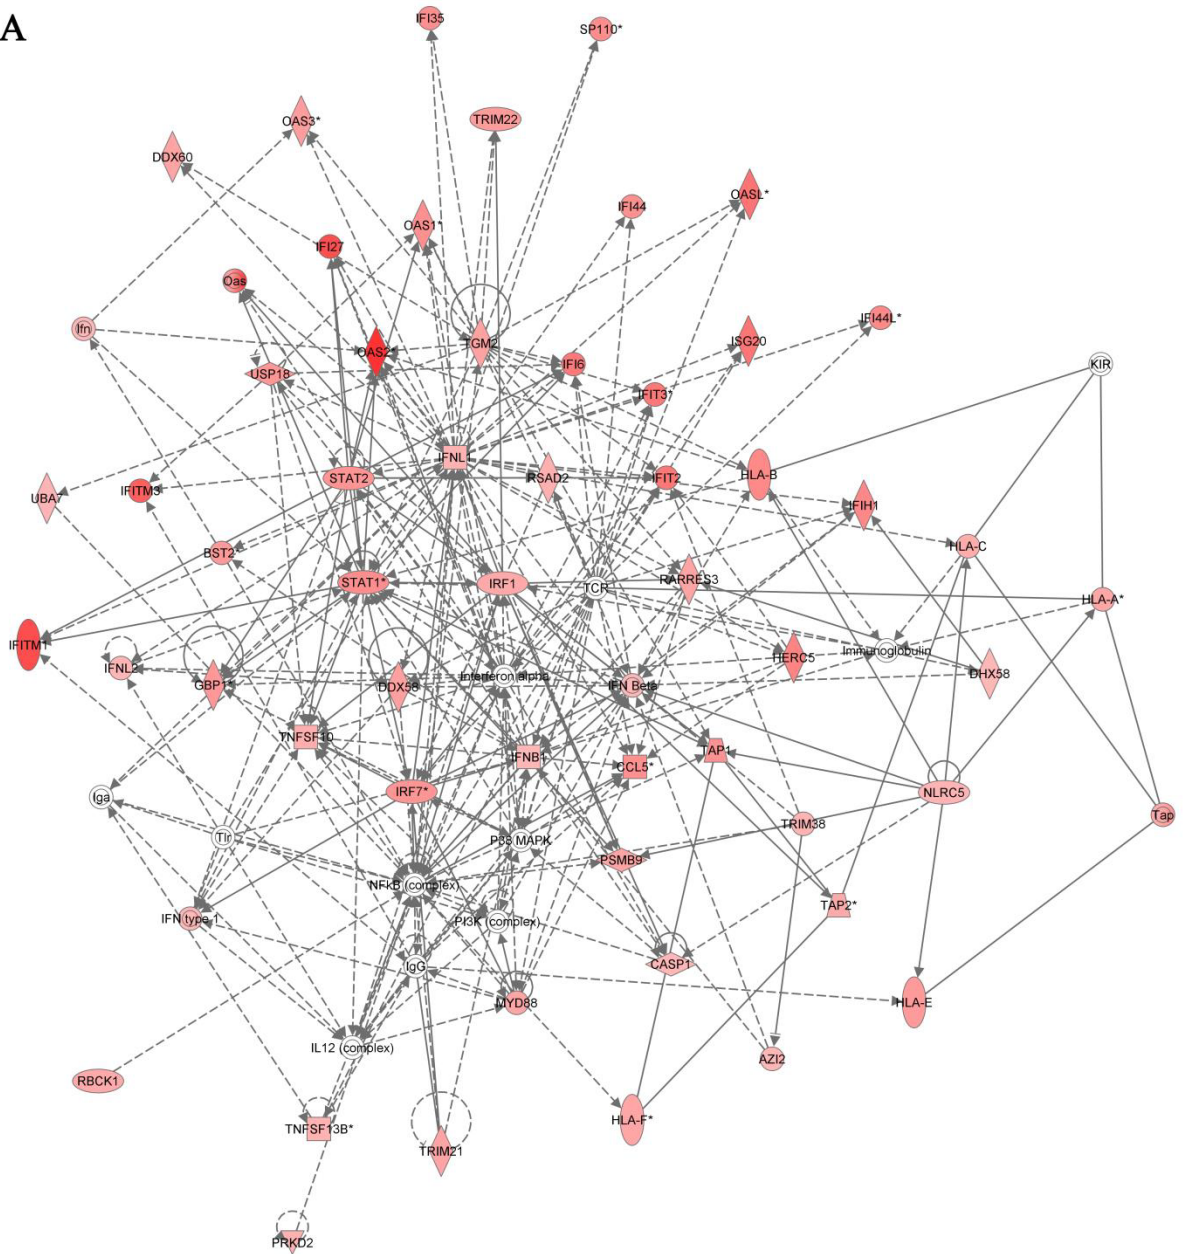

**B**

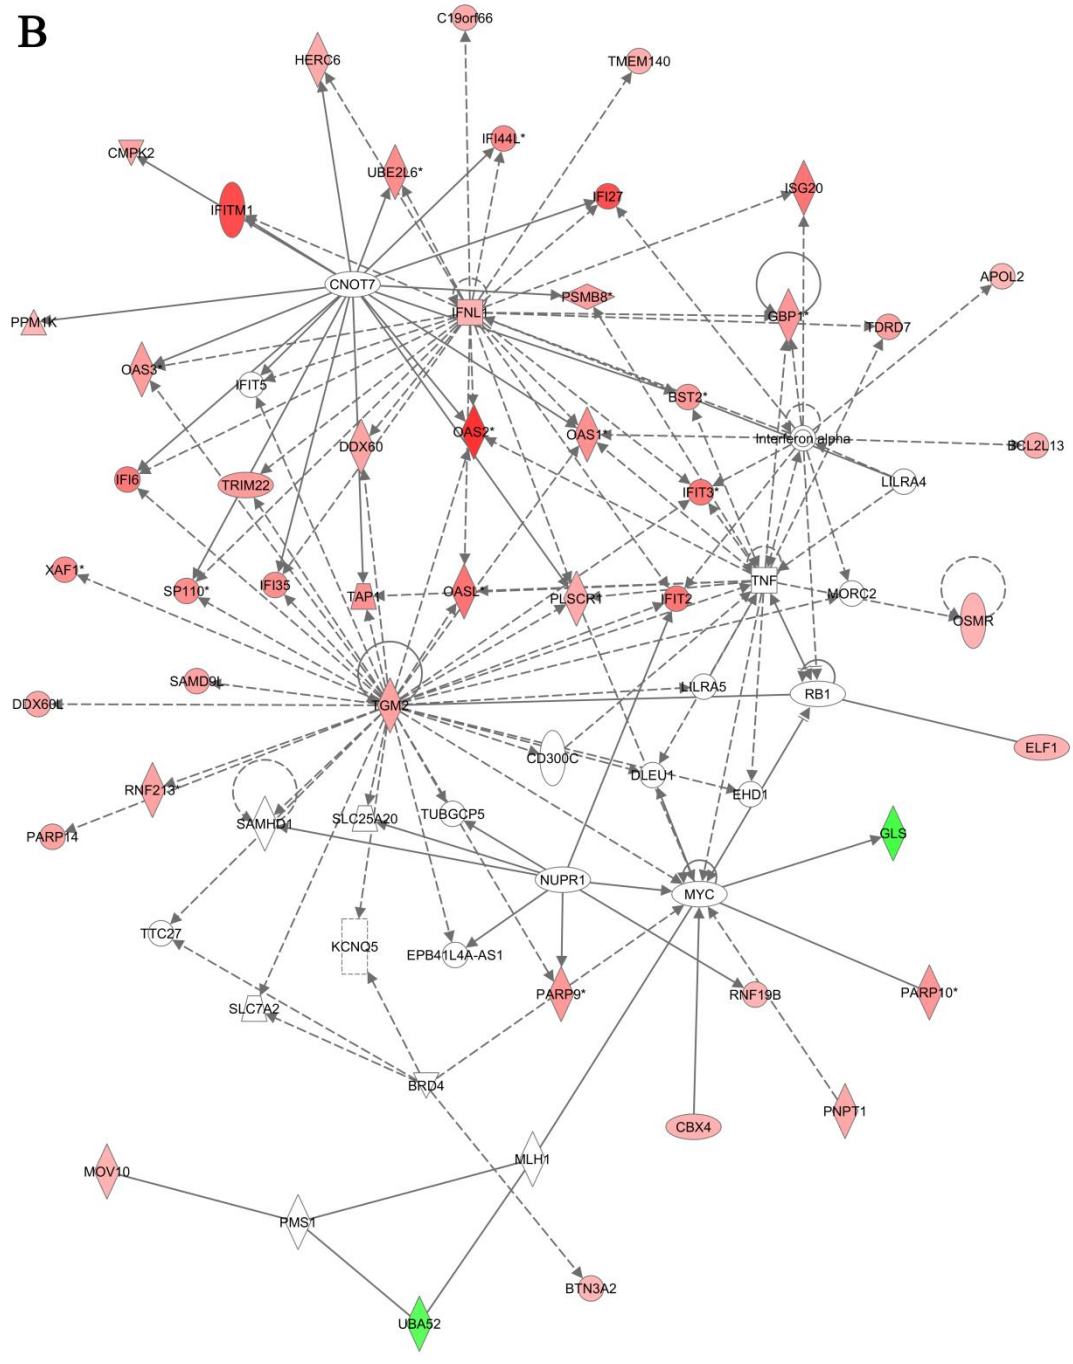

C

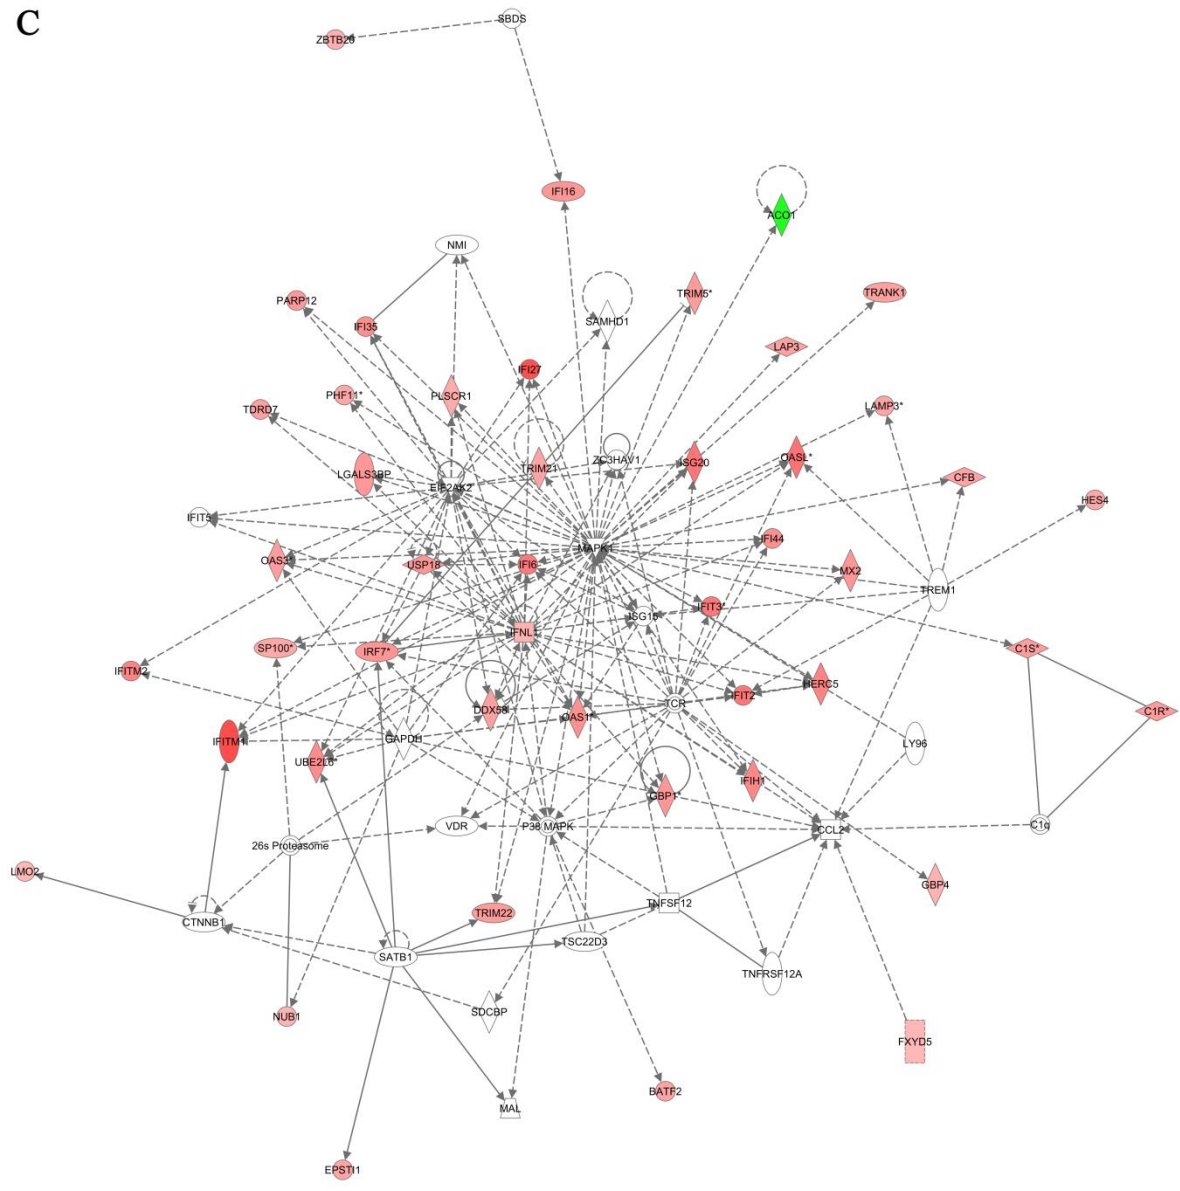

Supplement: MOESM3 [file 12046818]
